# Supplementary material for: Predictive modeling reveals that higher-order cooperativity drives transcriptional repression in a synthetic developmental enhancer
Source: eLife journal article supplement (doi:10.7554/elife.73395), 2022-12-12
Supplement: supp [file elife-73395-supp-v1.zip]

**A**

| STATE                                                                            | WEIGHT           | DEGEN-<br>ERACY                        | STATE                                                                              | WEIGHT                           | DEGEN-<br>ERACY                        |
|----------------------------------------------------------------------------------|------------------|----------------------------------------|------------------------------------------------------------------------------------|----------------------------------|----------------------------------------|
| 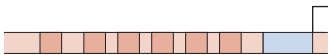 | 1                | 1                                      |  | $p$                              | 1                                      |
|  | $b$              | $\begin{pmatrix} 6 \\ 1 \end{pmatrix}$ |  | $b p \omega_{bp}$                | $\begin{pmatrix} 6 \\ 1 \end{pmatrix}$ |
|  | $b^2 \omega_b$   | $\begin{pmatrix} 6 \\ 2 \end{pmatrix}$ |  | $b^2 \omega_b p \omega_{bp}^2$   | $\begin{pmatrix} 6 \\ 2 \end{pmatrix}$ |
|  | $b^6 \omega_b^5$ | 1                                      |  | $b^6 p \omega_b^5 \omega_{bp}^6$ | 1                                      |

**B**

| STATE                                                                            | WEIGHT | DEGEN-<br>ERACY | STATE                                                                              | WEIGHT                | DEGEN-<br>ERACY |
|----------------------------------------------------------------------------------|--------|-----------------|------------------------------------------------------------------------------------|-----------------------|-----------------|
| 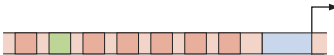 | 1      | 1               |  | $p$                   | 1               |
|  | $b'^6$ | 1               |  | $b'^6 p \omega'_{bp}$ | 1               |
