# Supplementary material for: Predictive modeling reveals that higher-order cooperativity drives transcriptional repression in a synthetic developmental enhancer
Source: eLife journal article supplement (doi:10.7554/elife.73395), 2022-12-12

A

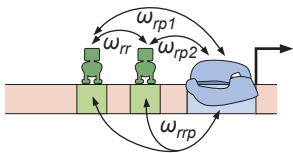

B

| STATE      | WEIGHT                | DEGEN-<br>ERACY | STATE | WEIGHT                                                                     | DEGEN-<br>ERACY |
|------------|-----------------------|-----------------|-------|----------------------------------------------------------------------------|-----------------|
|            | 1                     | 1               |       | $p$                                                                        | 1               |
| Bicoid<br> | $b^6$                 | 1               |       | $b^6 p \omega_{bp}$                                                        | 1               |
| Runt<br>   | $r$                   | 2               |       | $r p \omega_{rp1}$                                                         | 1               |
|            | $r^2 \omega_{rr}$     | 1               |       | $r p \omega_{rp2}$                                                         | 1               |
|            | $b^6 r$               | 2               |       | $r^2 p \omega_{rp1} \omega_{rp2} \omega_{rr} \omega_{rrp}$                 | 1               |
|            | $b^6 r^2 \omega_{rr}$ | 1               |       | $b^6 r p \omega_{bp} \omega_{rp1}$                                         | 1               |
|            |                       |                 |       | $b^6 r p \omega_{bp} \omega_{rp2}$                                         | 1               |
|            |                       |                 |       | $b^6 r^2 p \omega_{bp} \omega_{rp1} \omega_{rp2} \omega_{rr} \omega_{rrp}$ | 1               |

D

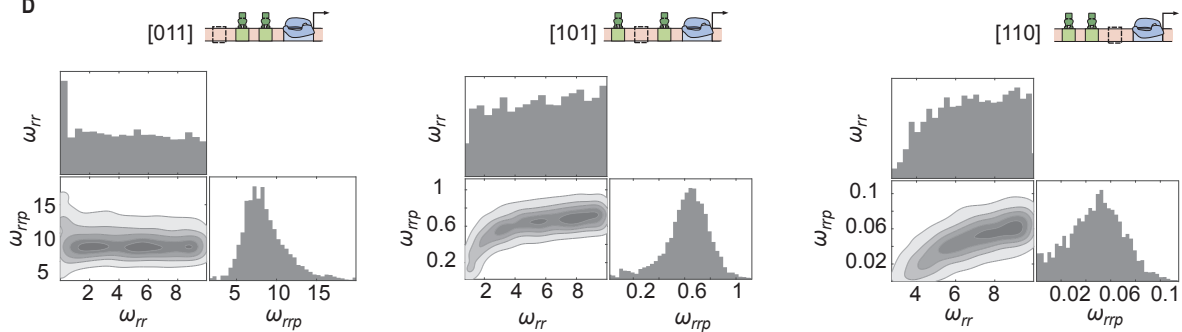

Supplement: supp [file elife-73395-supp-v1.zip]
