# Supplementary material for: Predictive modeling reveals that higher-order cooperativity drives transcriptional repression in a synthetic developmental enhancer
Source: eLife journal article supplement (doi:10.7554/elife.73395), 2022-12-12
Supplement: supp [file elife-73395-supp-v1.zip]

**A**

| STATE                                                                            | WEIGHT             | DEGEN-<br>ERACY                        | STATE                                                                             | WEIGHT                                         | DEGEN-<br>ERACY                        |
|----------------------------------------------------------------------------------|--------------------|----------------------------------------|-----------------------------------------------------------------------------------|------------------------------------------------|----------------------------------------|
|  | 1                  | 1                                      |  | $p$                                            | 1                                      |
|  | $b$                | $\begin{pmatrix} 6 \\ 1 \end{pmatrix}$ |  | $b p \omega_{bp}$                              | $\begin{pmatrix} 6 \\ 1 \end{pmatrix}$ |
|  | $b^2 \omega_b$     | $\begin{pmatrix} 6 \\ 2 \end{pmatrix}$ |  | $b^2 \omega_b p \omega_{bp}^2$                 | $\begin{pmatrix} 6 \\ 2 \end{pmatrix}$ |
|  | $b^6 \omega_b^5$   | 1                                      |  | $b^6 p \omega_b^5 \omega_{bp}^6$               | 1                                      |
|  | $r$                | 1                                      |  | $r p \omega_{rp}$                              | 1                                      |
|  | $b r$              | $\begin{pmatrix} 6 \\ 1 \end{pmatrix}$ |  | $b r p \omega_{bp} \omega_{rp}$                | $\begin{pmatrix} 6 \\ 1 \end{pmatrix}$ |
|  | $b^2 r \omega_b$   | $\begin{pmatrix} 6 \\ 2 \end{pmatrix}$ |  | $b^2 r p \omega_b \omega_{bp}^2 \omega_{rp}$   | $\begin{pmatrix} 6 \\ 2 \end{pmatrix}$ |
|  | $b^6 r \omega_b^5$ | 1                                      |  | $b^6 r p \omega_b^5 \omega_{bp}^6 \omega_{rp}$ | 1                                      |

**B**

| STATE                                                                              | WEIGHT   | DEGEN-<br>ERACY | STATE                                                                               | WEIGHT                              | DEGEN-<br>ERACY |
|------------------------------------------------------------------------------------|----------|-----------------|-------------------------------------------------------------------------------------|-------------------------------------|-----------------|
| 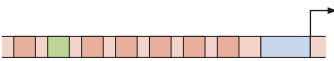 | 1        | 1               |  | $p$                                 | 1               |
|  | $b'^6$   | 1               |  | $b'^6 p \omega'_{bp}$               | 1               |
|  | $r$      | 1               |  | $r p \omega_{rp}$                   | 1               |
|  | $b'^6 r$ | 1               |  | $b'^6 r p \omega'_{bp} \omega_{rp}$ | 1               |
