# Supplementary material for: Predictive modeling reveals that higher-order cooperativity drives transcriptional repression in a synthetic developmental enhancer
Source: eLife journal article supplement (doi:10.7554/elife.73395), 2022-12-12

**A**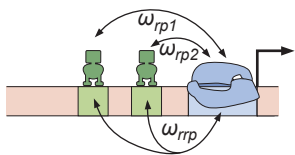**B**

| STATE      | WEIGHT    | DEGEN-<br>ERACY | STATE | WEIGHT                                                        | DEGEN-<br>ERACY |
|------------|-----------|-----------------|-------|---------------------------------------------------------------|-----------------|
|            | 1         | 1               |       | $p$                                                           | 1               |
| Bicoid<br> | $b^6$     | 1               |       | $b^6 p \omega_{bp}$                                           | 1               |
| Runt<br>   | $r$       | 2               |       | $r p \omega_{rp1}$                                            | 1               |
|            | $r^2$     | 1               |       | $r p \omega_{rp2}$                                            | 1               |
|            | $r^2$     | 1               |       | $r^2 p \omega_{rp1} \omega_{rp2} \omega_{rp}$                 | 1               |
|            | $b^6 r$   | 2               |       | $b^6 r p \omega_{bp} \omega_{rp1}$                            | 1               |
|            | $b^6 r$   | 2               |       | $b^6 r p \omega_{bp} \omega_{rp2}$                            | 1               |
|            | $b^6 r^2$ | 1               |       | $b^6 r^2 p \omega_{bp} \omega_{rp1} \omega_{rp2} \omega_{rp}$ | 1               |

**C**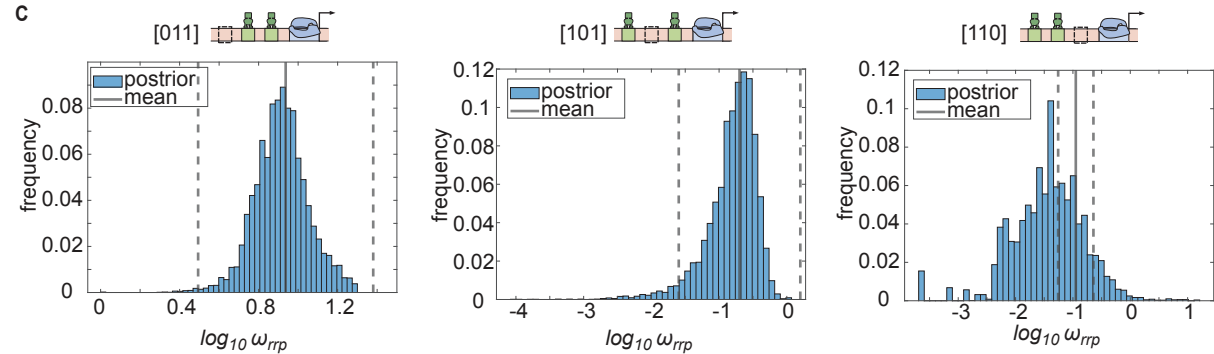

Supplement: supp [file elife-73395-supp-v1.zip]
