# Supplementary figures and images for: Predictive modeling reveals that higher-order cooperativity drives transcriptional repression in a synthetic developmental enhancer
Source: eLife journal article supplement (doi:10.7554/elife.73395), 2022-12-12

**A**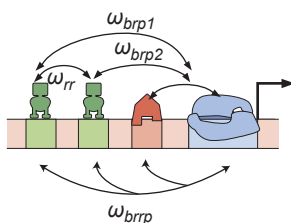**B**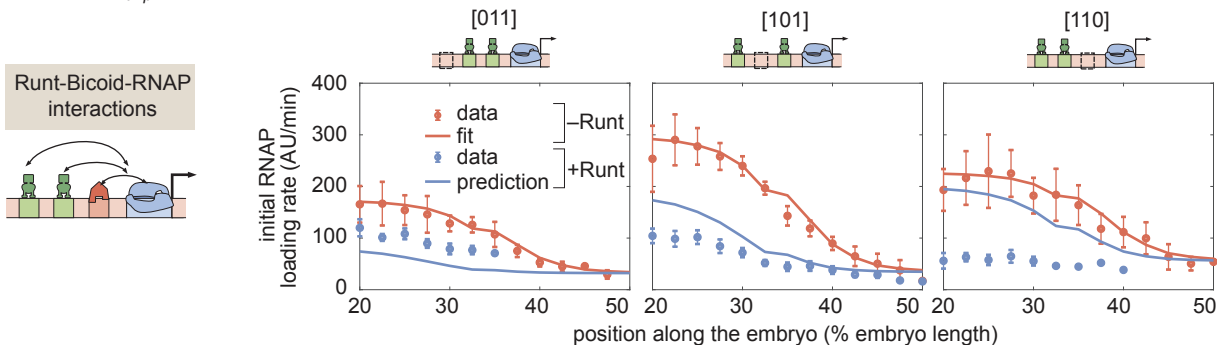**C**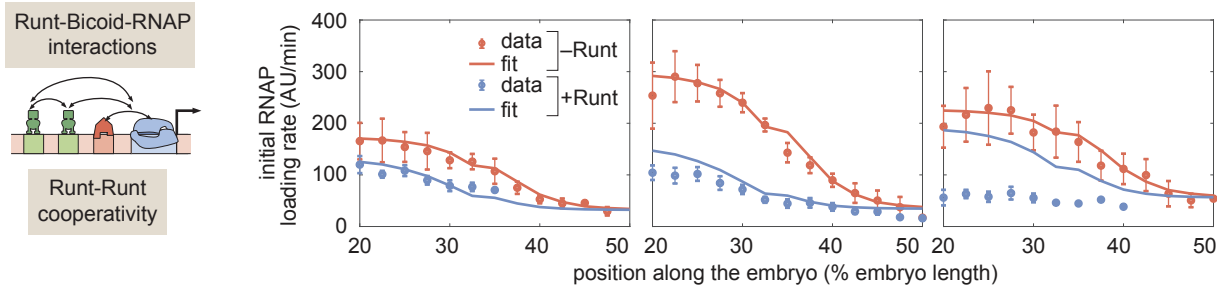**D**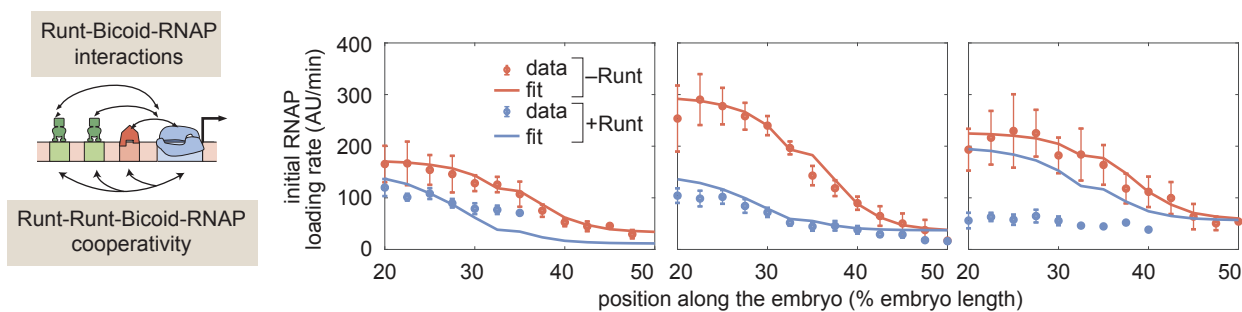**E**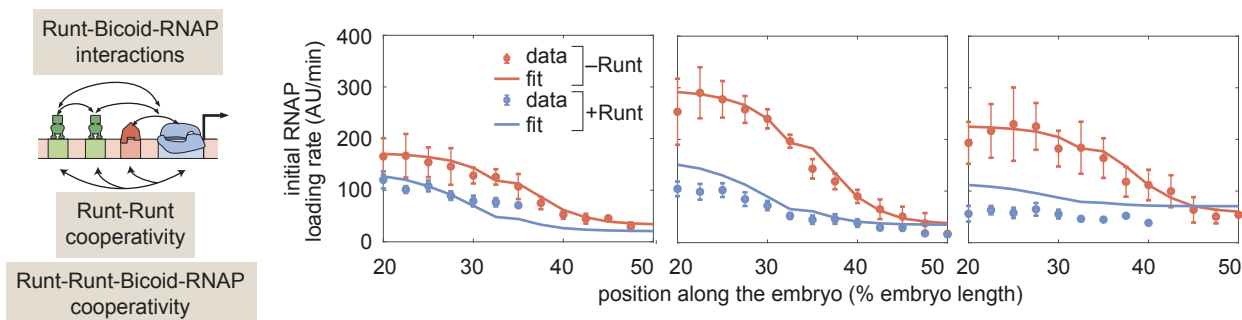

Supplement: supp [file elife-73395-supp-v1.zip]

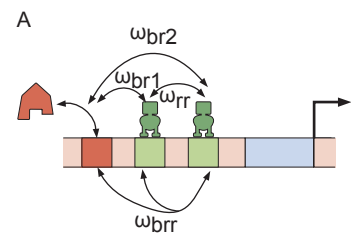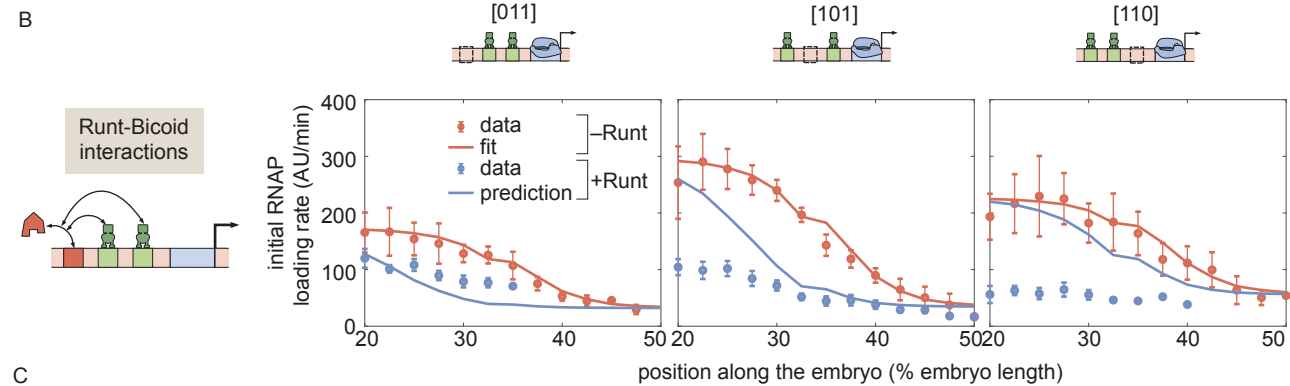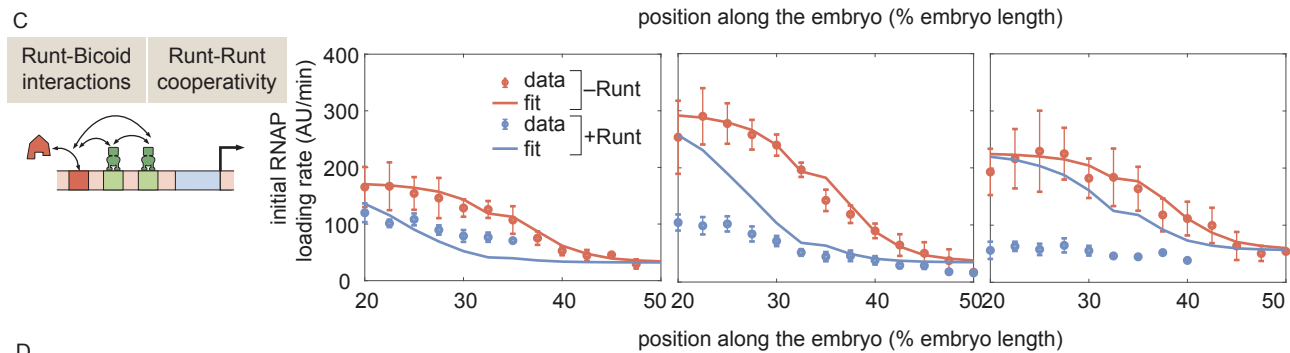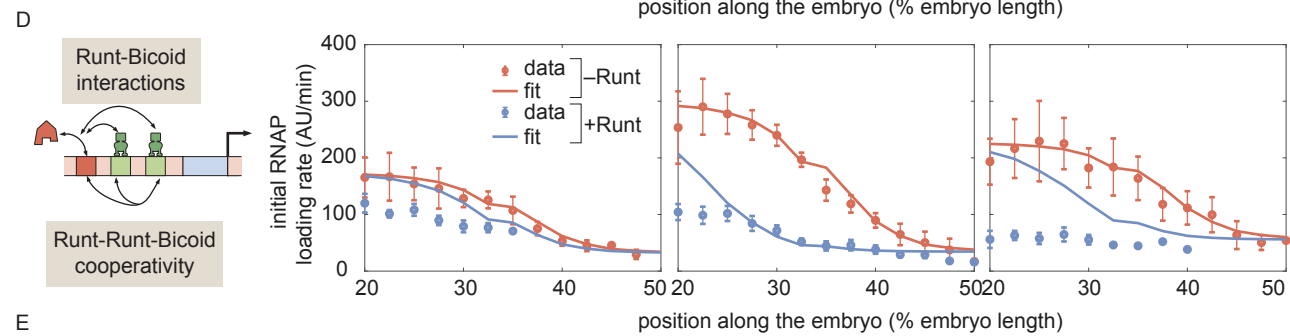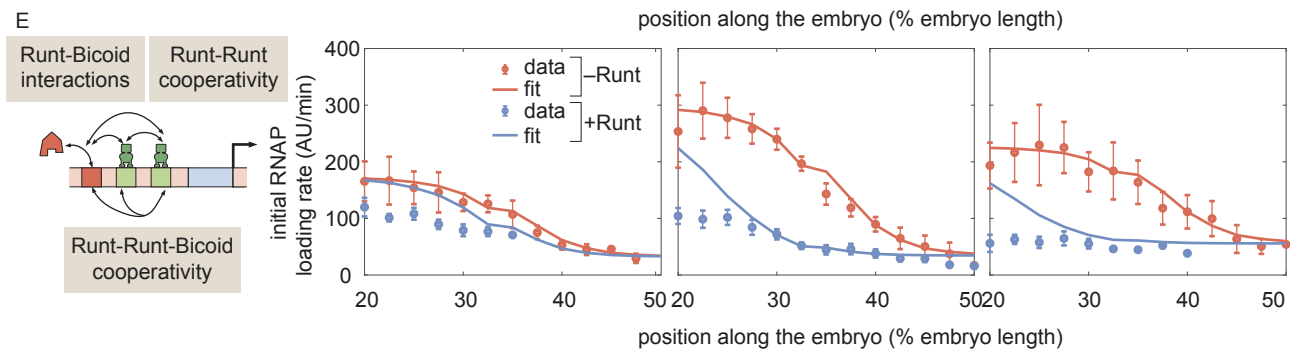

Supplement: supp [file elife-73395-supp-v1.zip]

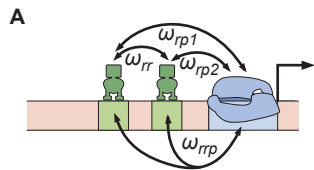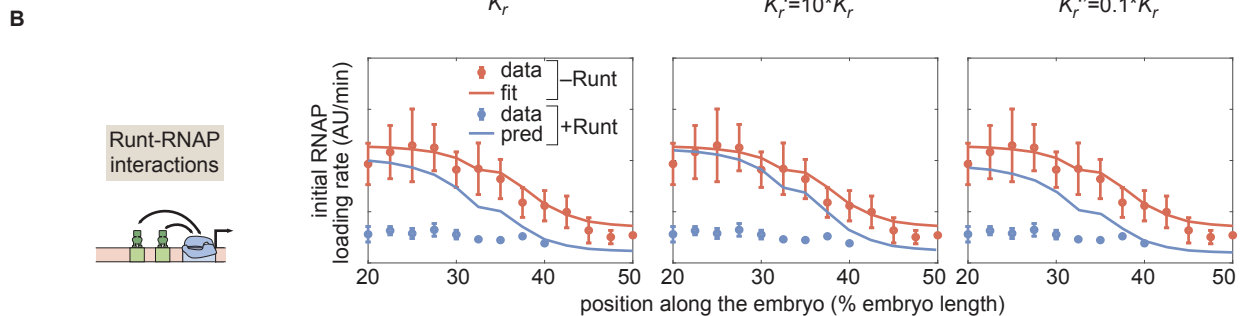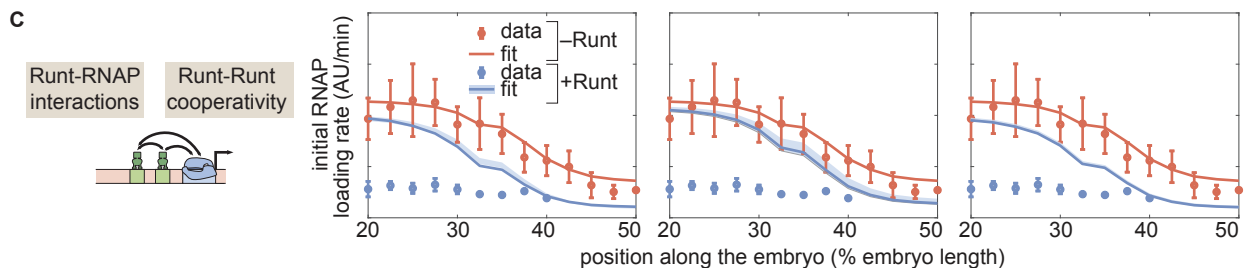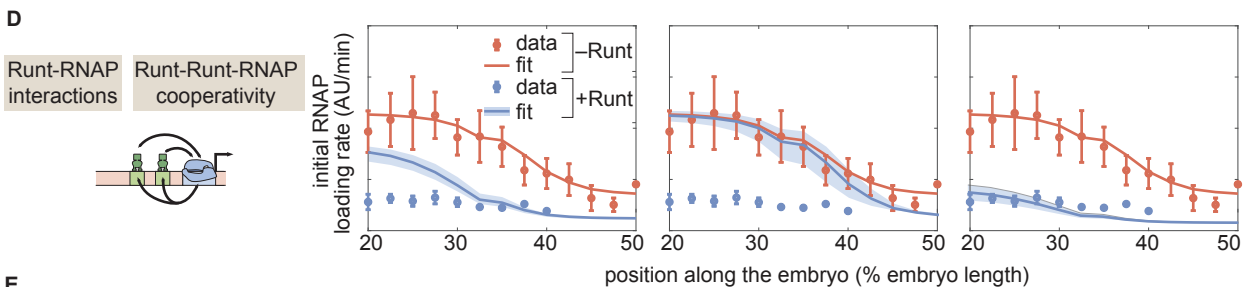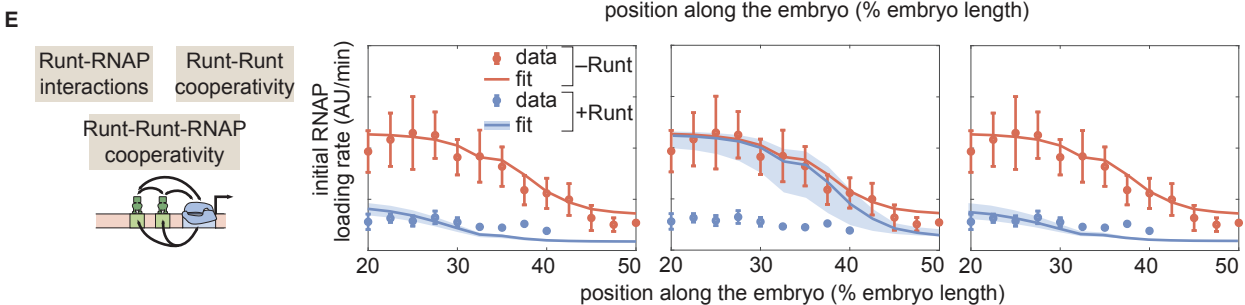

Supplement: supp [file elife-73395-supp-v1.zip]

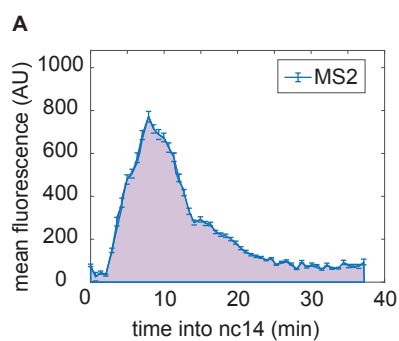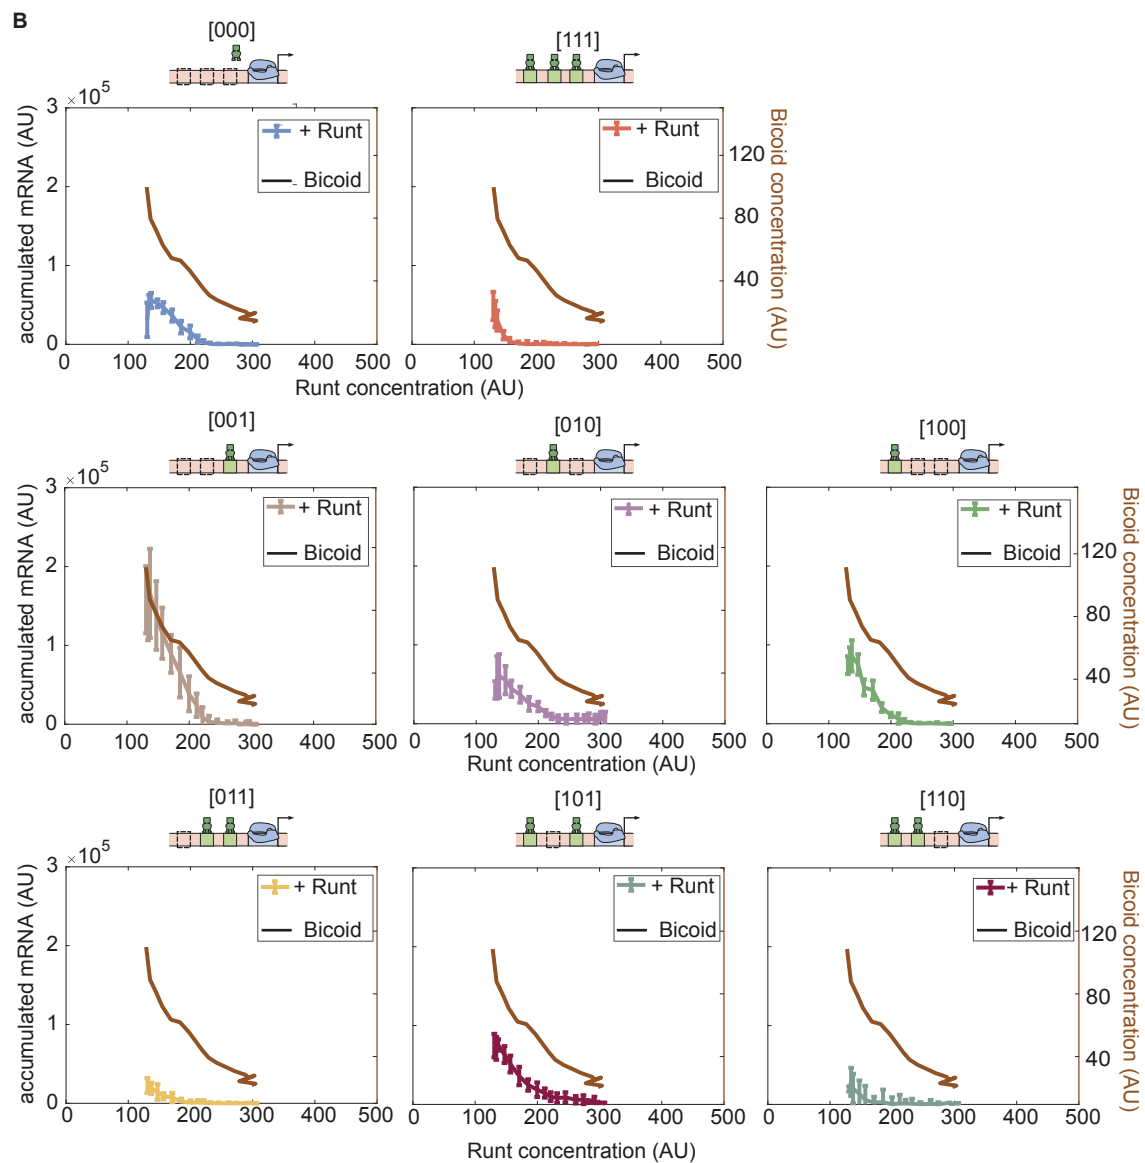

Supplement: supp [file elife-73395-supp-v1.zip]

**A**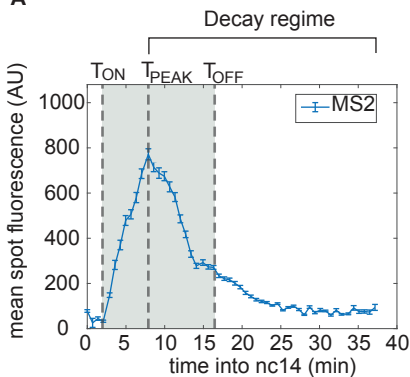**B**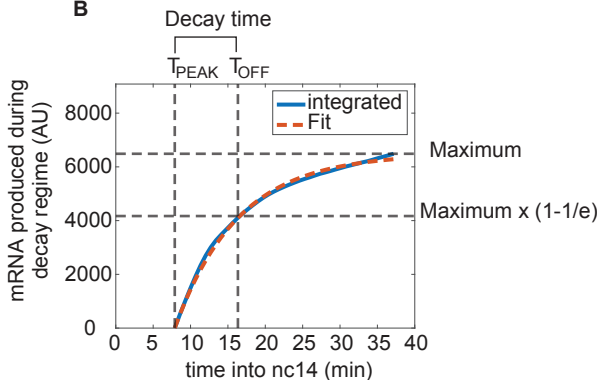**C**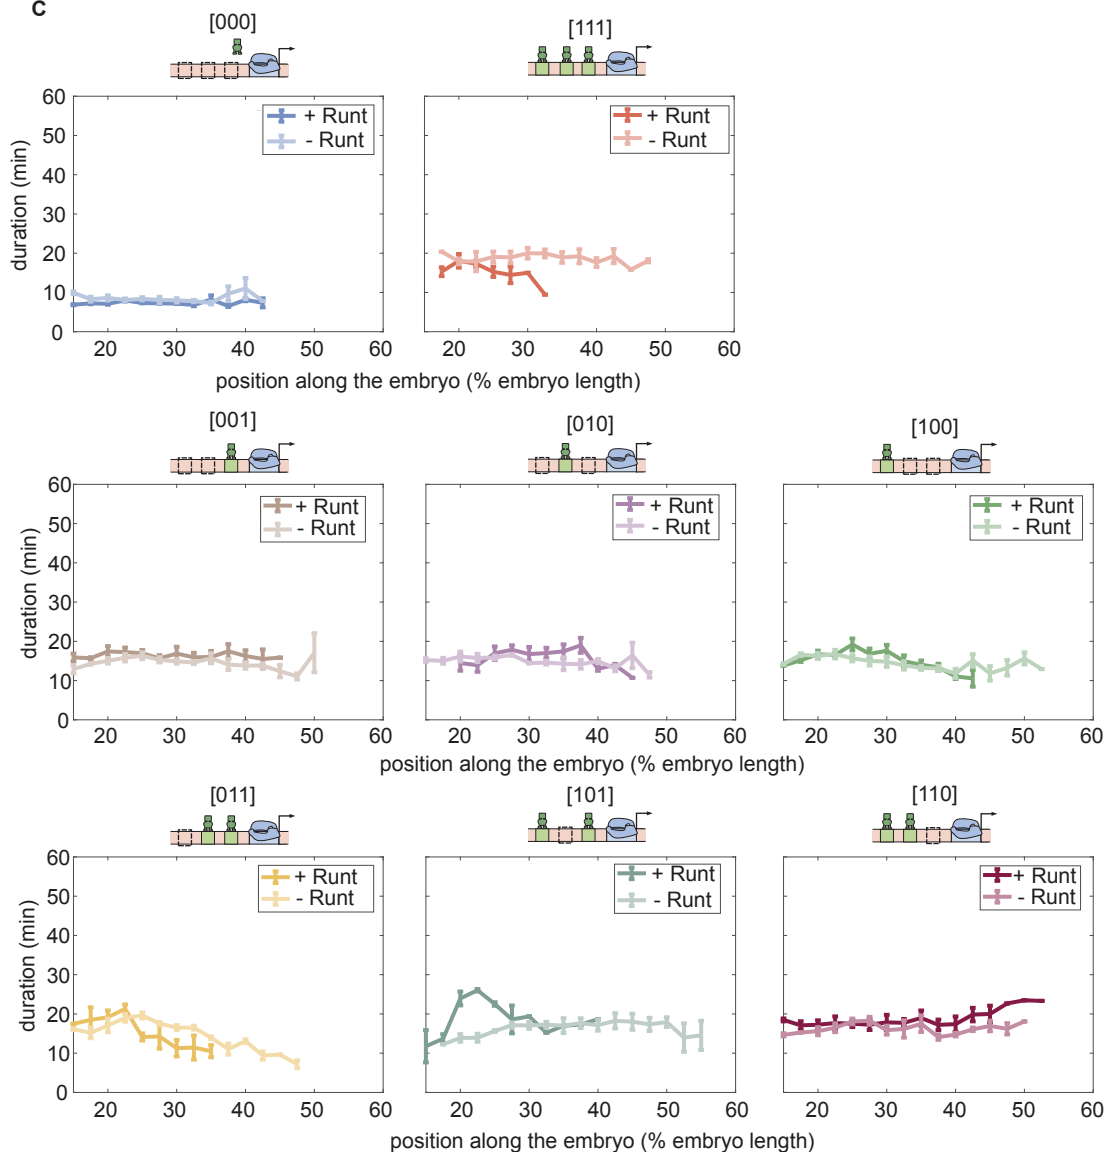

Supplement: supp [file elife-73395-supp-v1.zip]

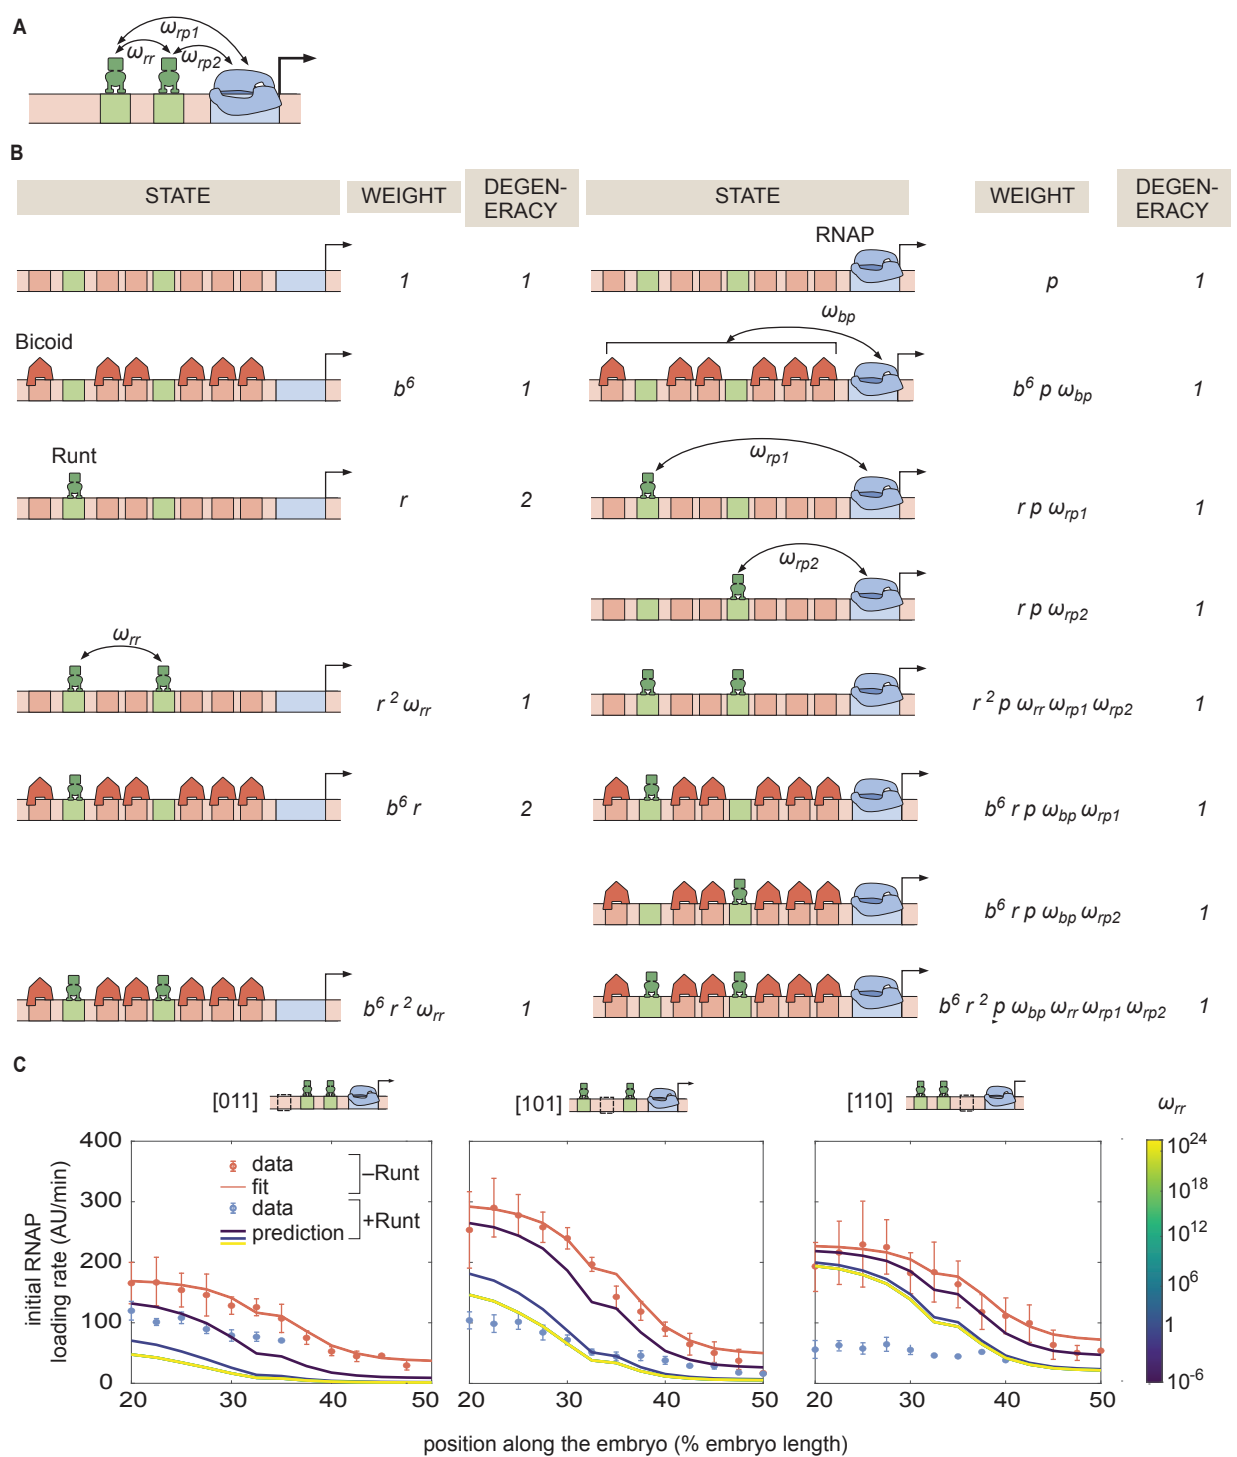

Supplement: supp [file elife-73395-supp-v1.zip]

**A**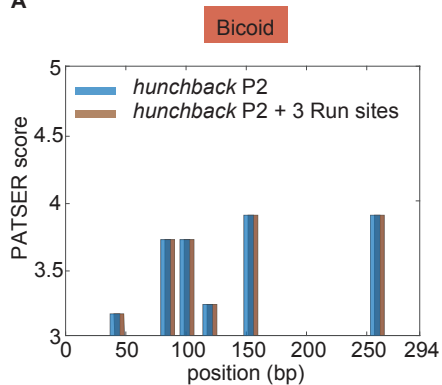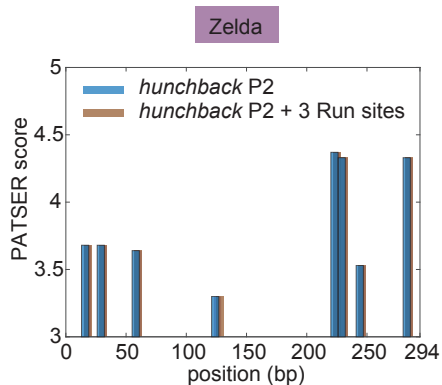**B**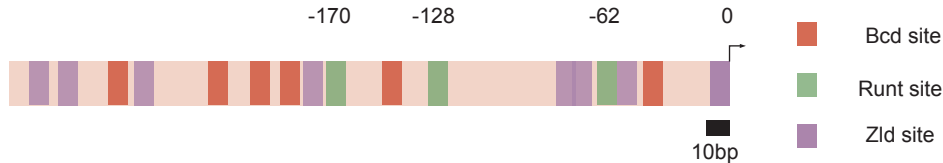

Supplement: supp [file elife-73395-supp-v1.zip]

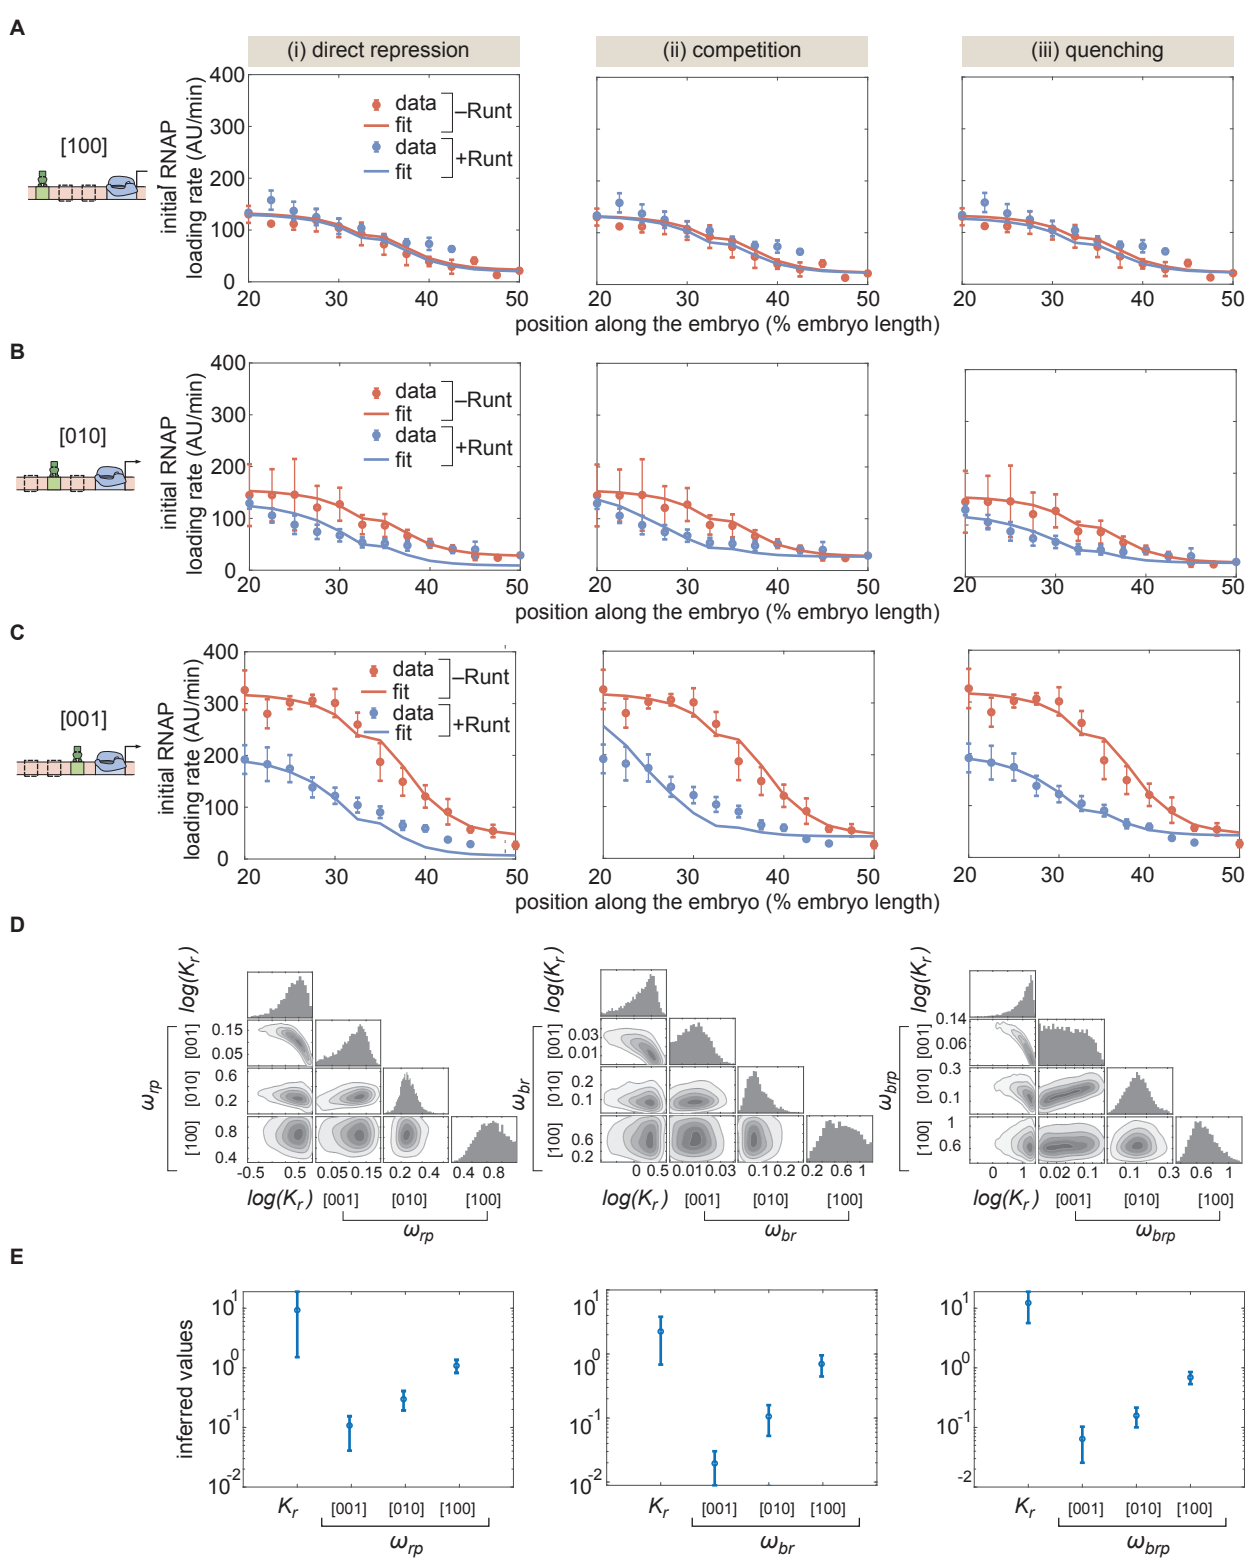

Supplement: supp [file elife-73395-supp-v1.zip]

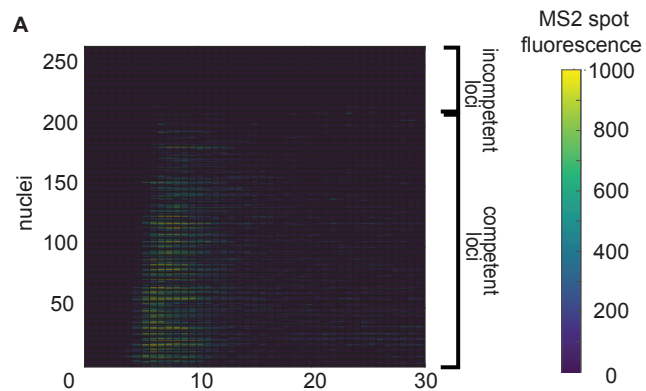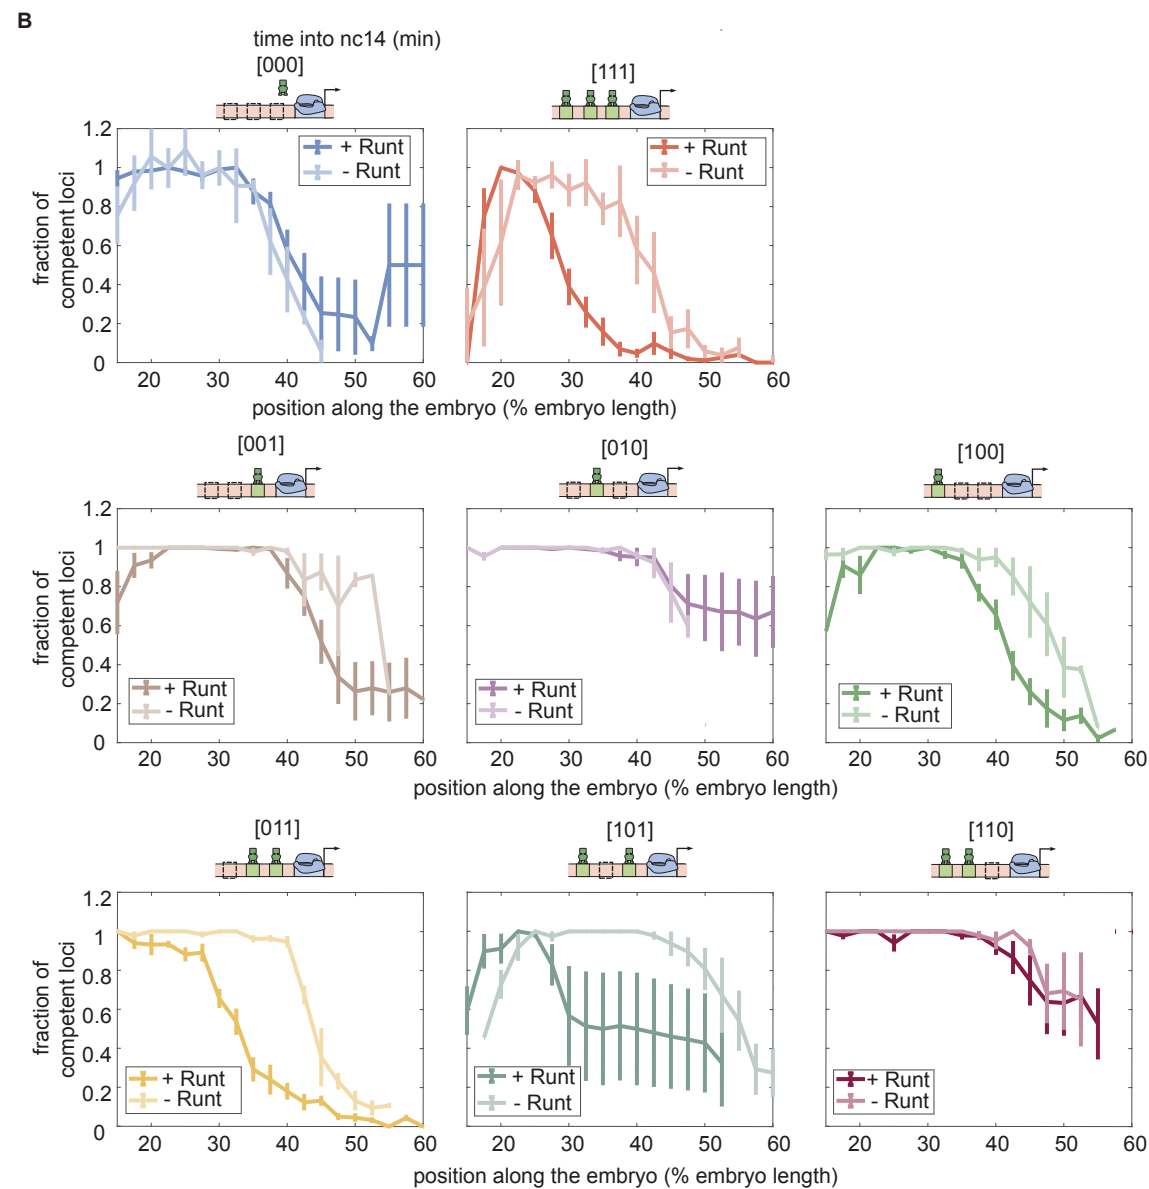

Supplement: supp [file elife-73395-supp-v1.zip]

**A**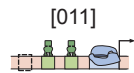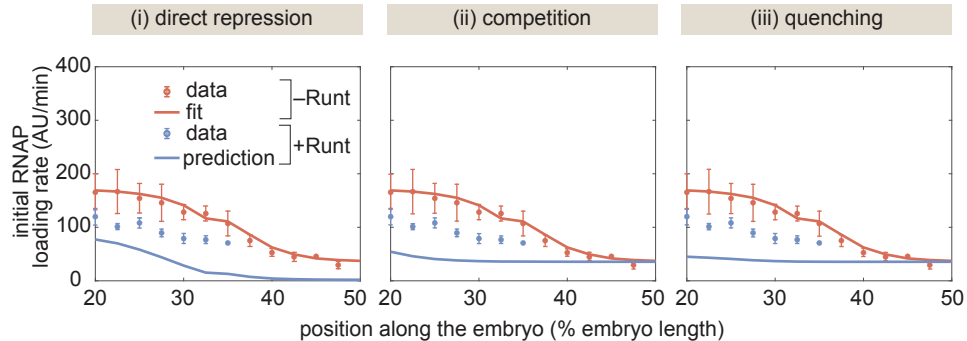**B**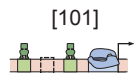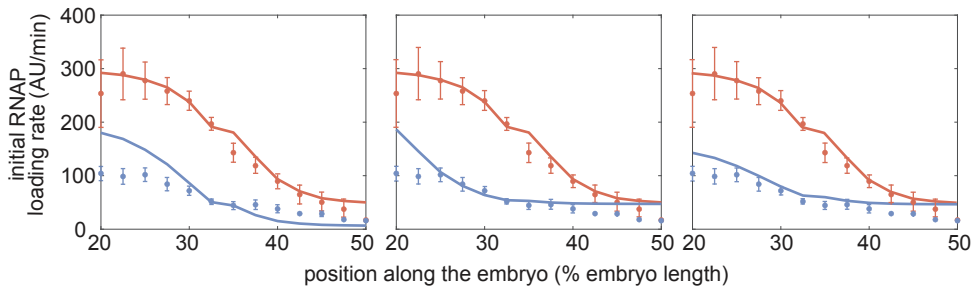**C**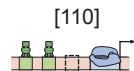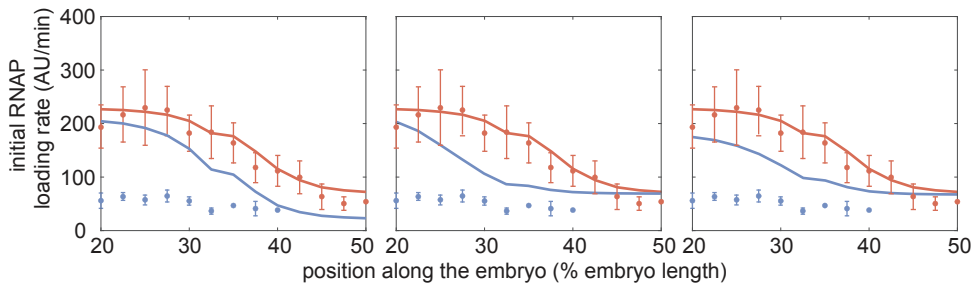

Supplement: supp [file elife-73395-supp-v1.zip]

**A**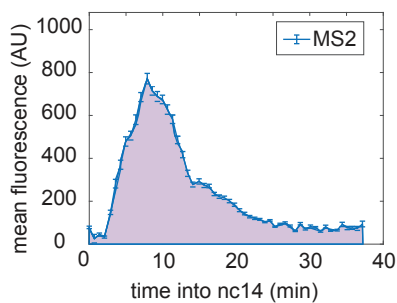**B**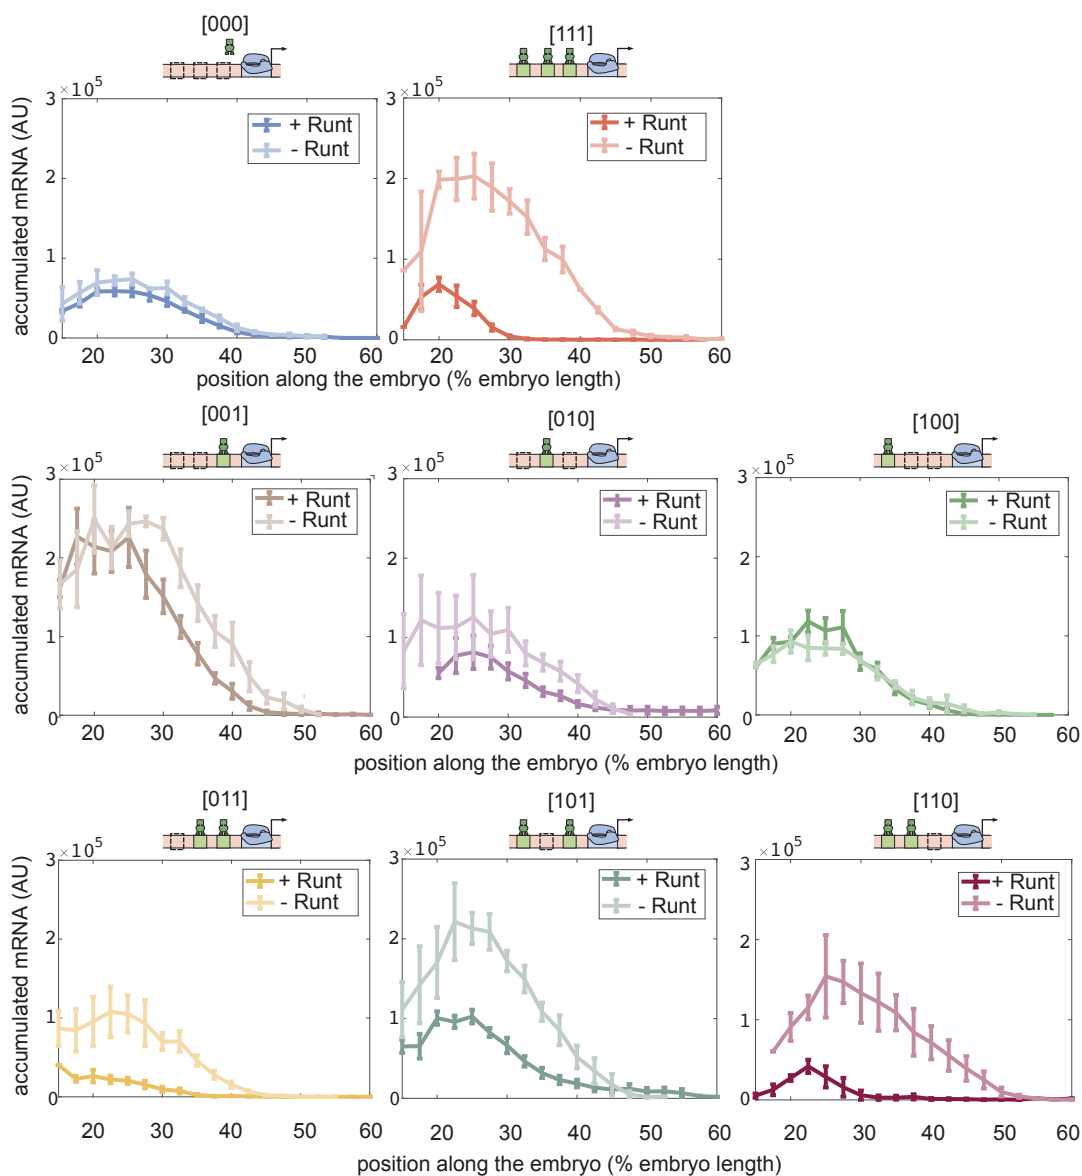

Supplement: supp [file elife-73395-supp-v1.zip]

A

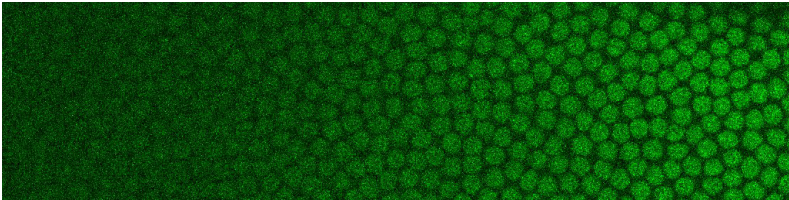

eGFP: LlammaTag-Runt

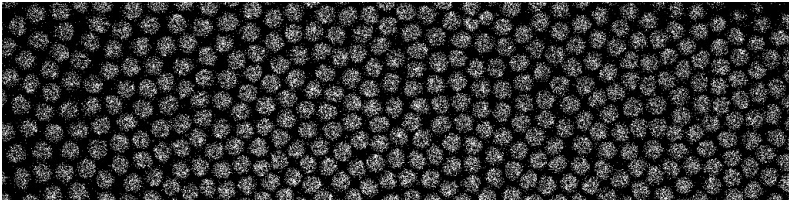

Histone-iRFP

Supplement: supp [file elife-73395-supp-v1.zip]

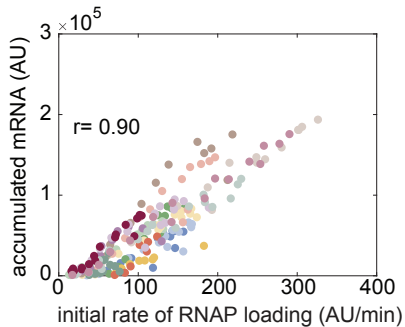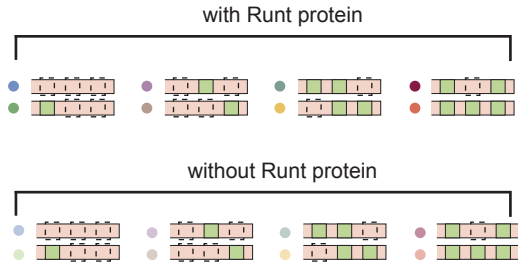

Supplement: supp [file elife-73395-supp-v1.zip]

### A direct repression

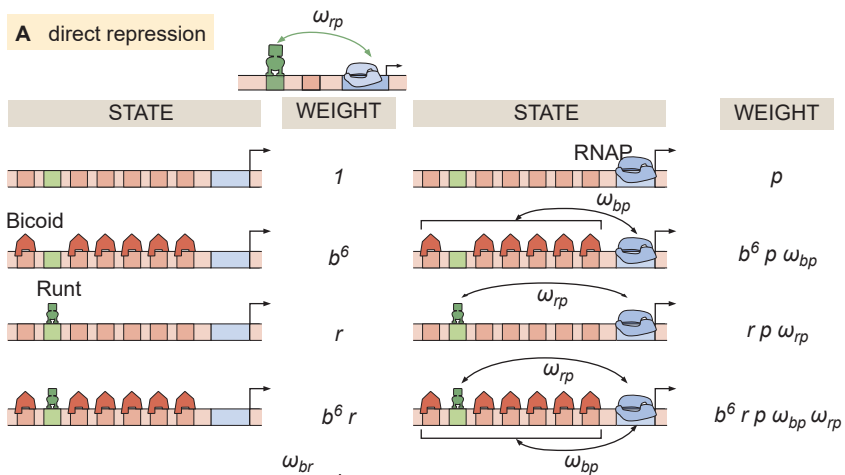

### B competition

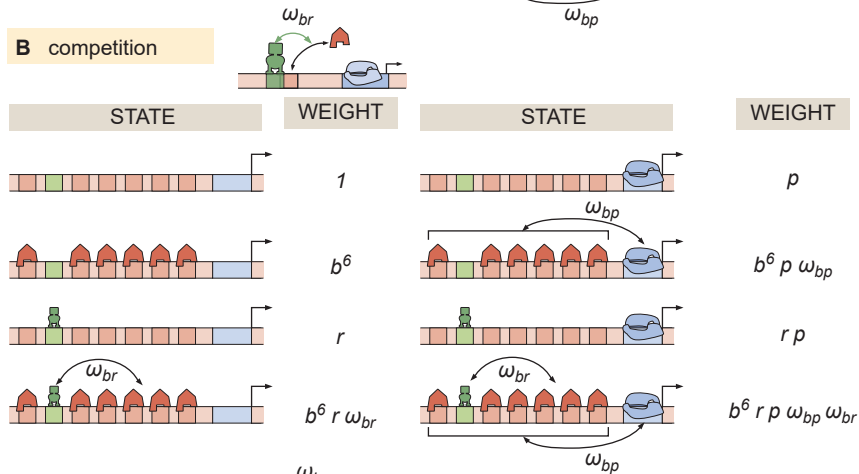

### C quenching

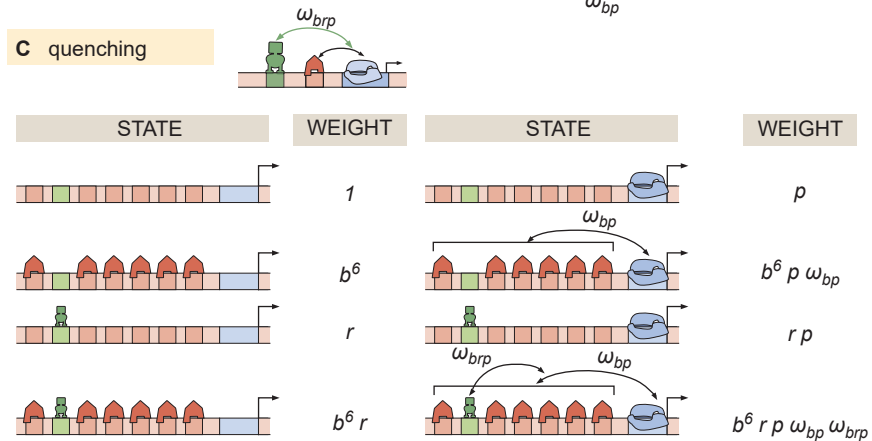

Supplement: supp [file elife-73395-supp-v1.zip]

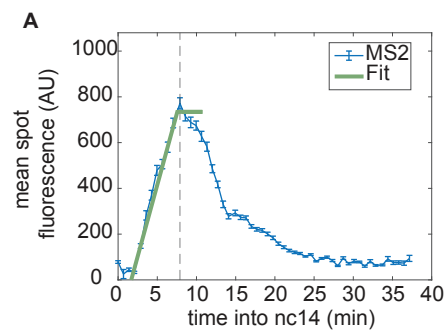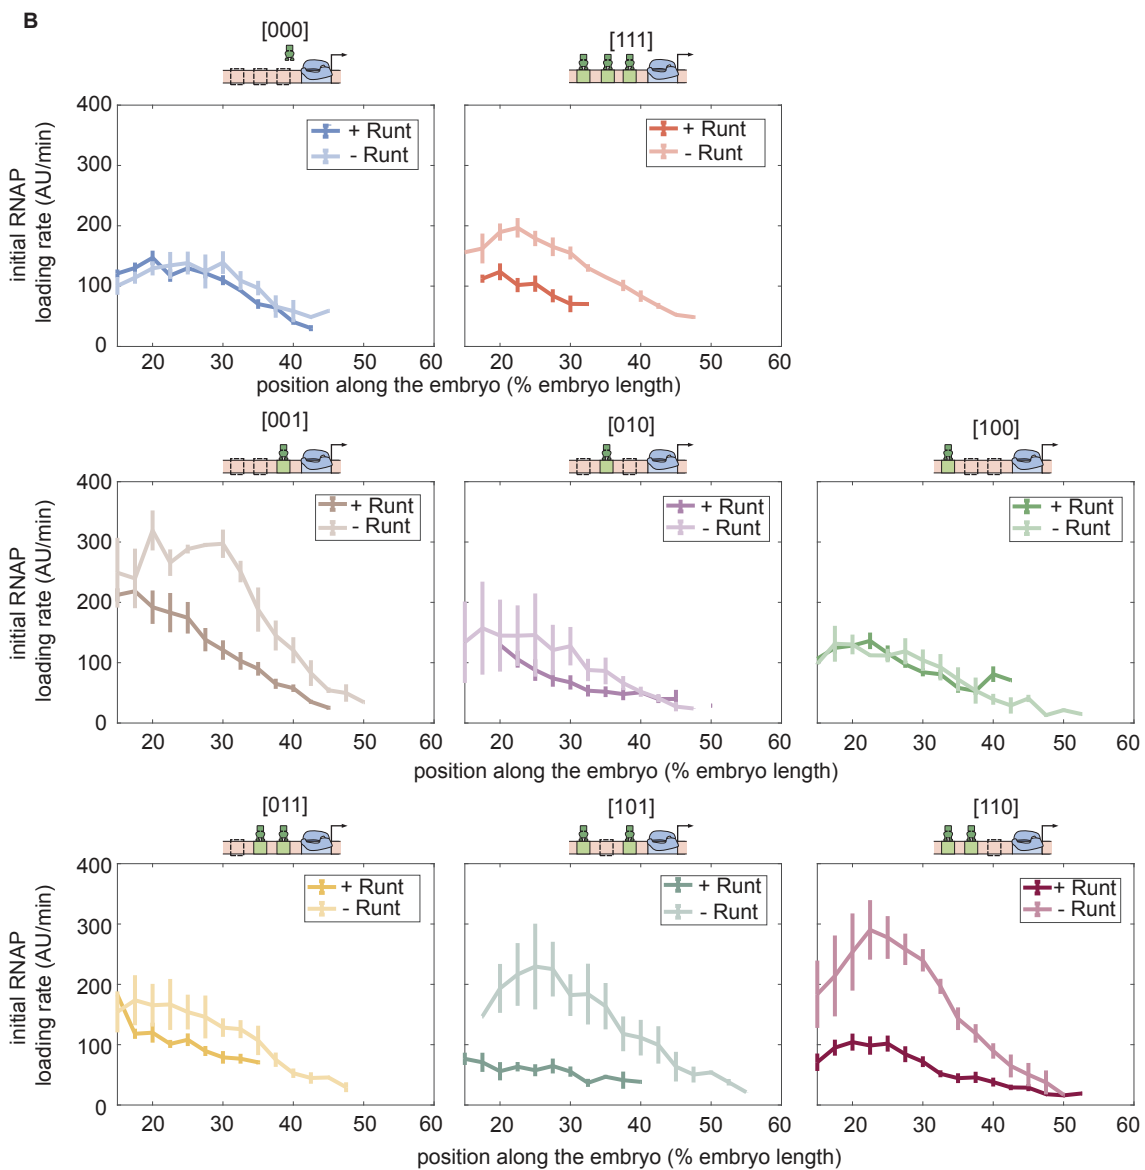

Supplement: supp [file elife-73395-supp-v1.zip]

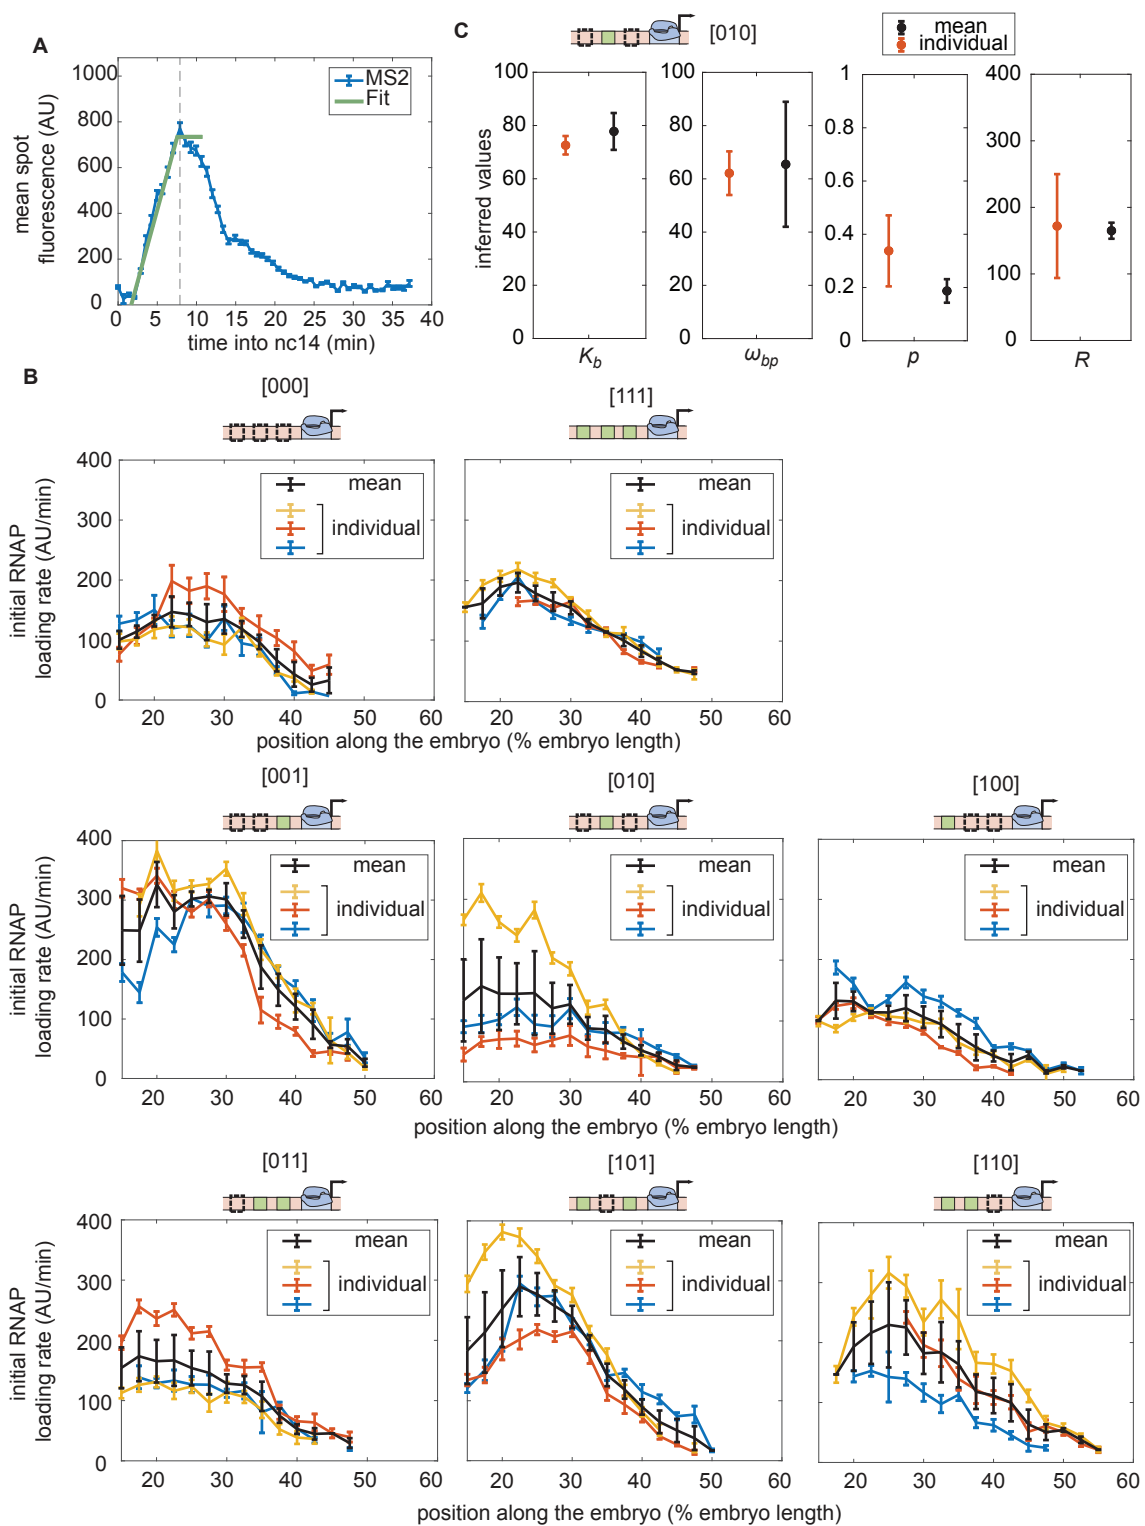

Supplement: supp [file elife-73395-supp-v1.zip]

**A**

time window

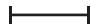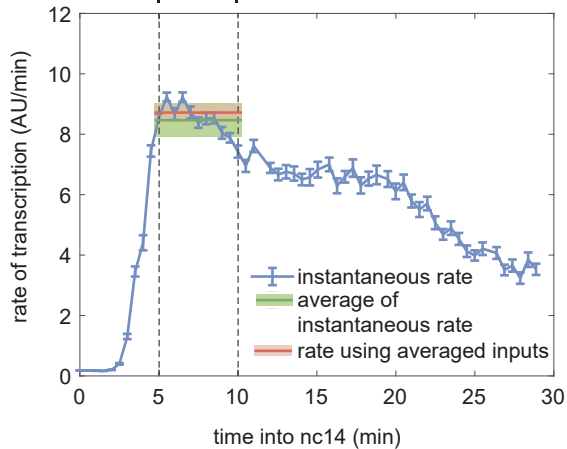**B**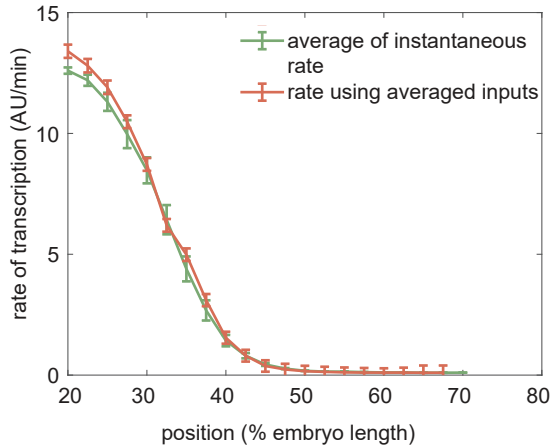

Supplement: supp [file elife-73395-supp-v1.zip]
